# Supplementary material for: From Molecules to Behavior in Long-Term Inorganic Mercury Intoxication: Unraveling Proteomic Features in Cerebellar Neurodegeneration of Rats
Source: MDPI journal article supplement (doi:10.3390/ijms23010111), 2021-12-22
Supplement: s1 [file s1]

## Supplementary Materials

| <sup>a</sup> Access Number | Protein name description                                             | PLGS Score | Fold change |
|----------------------------|----------------------------------------------------------------------|------------|-------------|
| P34926                     | Microtubule-associated protein 1A                                    | 71         | 4.35        |
| P62762                     | Visinin-like protein 1                                               | 183        | 1.63        |
| P11506                     | Plasma membrane calcium-transporting ATPase 2                        | 43         | 1.52        |
| P07171                     | Calbindin                                                            | 44         | 1.51        |
| P10888                     | Cytochrome c oxidase subunit 4 isoform 1_ mitochondrial              | 146        | 1.46        |
| P0DP29                     | Calmodulin-1                                                         | 1825       | 1.39        |
| P0DP30                     | Calmodulin-2                                                         | 1825       | 1.39        |
| P0DP31                     | Calmodulin-3                                                         | 1868       | 1.38        |
| Q64568                     | Plasma membrane calcium-transporting ATPase 3                        | 53         | 1.31        |
| P04631                     | Protein S100-B                                                       | 5719       | 1.30        |
| Q812E9                     | Neuronal membrane glycoprotein M6-a                                  | 246        | 1.30        |
| Q63345                     | Myelin-oligodendrocyte glycoprotein                                  | 290        | 1.30        |
| P29101                     | Synaptotagmin-2                                                      | 147        | 1.28        |
| P85515                     | Alpha-centractin                                                     | 84         | 1.28        |
| P09626                     | Potassium-transporting ATPase alpha chain 1                          | 172        | 1.27        |
| P47861                     | Synaptotagmin-5                                                      | 75         | 1.27        |
| P80254                     | D-dopachrome decarboxylase                                           | 706        | 1.25        |
| Q00729                     | Histone H2B type 1-A                                                 | 806        | 1.23        |
| P13638                     | Sodium/potassium-transporting ATPase subunit beta-2                  | 214        | 1.23        |
| P21707                     | Synaptotagmin-1                                                      | 114        | 1.20        |
| P07825                     | Synaptophysin                                                        | 287        | 1.16        |
| Q63198                     | Contactin-1                                                          | 129        | 1.15        |
| P29994                     | Inositol 1_4_5-trisphosphate receptor type 1                         | 67         | 1.15        |
| P0C0S7                     | Histone H2A.Z                                                        | 1423       | 1.14        |
| P12928                     | Pyruvate kinase PKLR                                                 | 879        | 1.12        |
| P06685                     | Sodium/potassium-transporting ATPase subunit alpha-1                 | 839        | 1.11        |
| P13233                     | 2'_3'-cyclic-nucleotide 3'-phosphodiesterase                         | 2858       | 1.09        |
| P06687                     | Sodium/potassium-transporting ATPase subunit alpha-3                 | 803        | 1.08        |
| Q6Q7Y5                     | Guanine nucleotide-binding protein subunit alpha-13                  | 547        | 1.08        |
| Q63803                     | Guanine nucleotide-binding protein G(s) subunit alpha isoforms XLas  | 532        | 1.08        |
| P63095                     | Guanine nucleotide-binding protein G(s) subunit alpha isoforms short | 532        | 1.07        |

|        |                                                                   |       |      |
|--------|-------------------------------------------------------------------|-------|------|
| P06686 | Sodium/potassium-transporting ATPase subunit alpha-2              | 753   | 1.06 |
| P14659 | Heat shock-related 70 kDa protein 2                               | 1758  | 1.05 |
| P02770 | Serum albumin                                                     | 865   | 0.96 |
| Q9R1Z0 | Voltage-dependent anion-selective channel protein 3               | 491   | 0.95 |
| P68035 | Actin_ alpha cardiac muscle 1                                     | 10469 | 0.94 |
| P68136 | Actin_ alpha skeletal muscle                                      | 10469 | 0.94 |
| P63269 | Actin_ gamma-enteric smooth muscle                                | 10432 | 0.94 |
| P61765 | Syntaxin-binding protein 1                                        | 5526  | 0.94 |
| P62738 | Actin_ aortic smooth muscle                                       | 10432 | 0.93 |
| P39052 | Dynamin-2                                                         | 128   | 0.92 |
| O88989 | Malate dehydrogenase_ cytoplasmic                                 | 3528  | 0.92 |
| P09117 | Fructose-bisphosphate aldolase C                                  | 13010 | 0.92 |
| Q05962 | ADP/ATP translocase 1                                             | 496   | 0.91 |
| Q64559 | Cytosolic acyl coenzyme A thioester hydrolase                     | 399   | 0.91 |
| P10111 | Peptidyl-prolyl cis-trans isomerase A                             | 7977  | 0.91 |
| P63039 | 60 kDa heat shock protein_ mitochondrial                          | 871   | 0.91 |
| P04636 | Malate dehydrogenase_ mitochondrial                               | 12671 | 0.91 |
| P11730 | Calcium/calmodulin-dependent protein kinase type II subunit gamma | 323   | 0.90 |
| P61983 | 14-3-3 protein gamma                                              | 4079  | 0.90 |
| P08413 | Calcium/calmodulin-dependent protein kinase type II subunit beta  | 450   | 0.90 |
| P62632 | Elongation factor 1-alpha 2                                       | 2214  | 0.90 |
| P0DMW1 | Heat shock 70 kDa protein 1B                                      | 477   | 0.90 |
| P07335 | Creatine kinase B-type                                            | 11832 | 0.90 |
| P62630 | Elongation factor 1-alpha 1                                       | 2246  | 0.90 |
| Q00981 | Ubiquitin carboxyl-terminal hydrolase isozyme L1                  | 733   | 0.89 |
| P00406 | Cytochrome c oxidase subunit 2                                    | 787   | 0.89 |
| Q5RKI0 | WD repeat-containing protein 1                                    | 158   | 0.88 |
| P26772 | 10 kDa heat shock protein_ mitochondrial                          | 1543  | 0.88 |
| Q99NA5 | Isocitrate dehydrogenase [NAD] subunit alpha_ mitochondrial       | 537   | 0.88 |
| P55063 | Heat shock 70 kDa protein 1-like                                  | 480   | 0.87 |
| P0DMW0 | Heat shock 70 kDa protein 1A                                      | 485   | 0.87 |
| P49432 | Pyruvate dehydrogenase E1 component subunit beta_ mitochondrial   | 416   | 0.87 |
| Q9QWN8 | Spectrin beta chain_ non-erythrocytic 2                           | 59    | 0.87 |

|        |                                                                                                          |       |      |
|--------|----------------------------------------------------------------------------------------------------------|-------|------|
| Q09073 | ADP/ATP translocase 2                                                                                    | 295   | 0.86 |
| Q06647 | ATP synthase subunit O_ mitochondrial                                                                    | 906   | 0.86 |
| P47858 | ATP-dependent 6-phosphofructokinase_ muscle type                                                         | 211   | 0.86 |
| P47860 | ATP-dependent 6-phosphofructokinase_ platelet type                                                       | 157   | 0.85 |
| P11275 | Calcium/calmodulin-dependent protein kinase type II subunit alpha                                        | 220   | 0.85 |
| P25809 | Creatine kinase U-type_ mitochondrial                                                                    | 1185  | 0.85 |
| P08461 | Dihydrolipoyllysine-residue acetyltransferase component of pyruvate dehydrogenase complex_ mitochondrial | 334   | 0.85 |
| P30904 | Macrophage migration inhibitory factor                                                                   | 3514  | 0.85 |
| B0BNF1 | Septin-8                                                                                                 | 589   | 0.85 |
| B3GNI6 | Septin-11                                                                                                | 471   | 0.84 |
| P11030 | Acyl-CoA-binding protein                                                                                 | 2961  | 0.84 |
| Q68FY0 | Cytochrome b-c1 complex subunit 1_ mitochondrial                                                         | 575   | 0.84 |
| O35179 | Endophilin-A1                                                                                            | 1190  | 0.84 |
| P62804 | Histone H4                                                                                               | 5391  | 0.84 |
| P25113 | Phosphoglycerate mutase 1                                                                                | 6217  | 0.84 |
| P62815 | V-type proton ATPase subunit B_ brain isoform                                                            | 413   | 0.84 |
| P12075 | Cytochrome c oxidase subunit 5B_ mitochondrial                                                           | 943   | 0.84 |
| Q64119 | Myosin light polypeptide 6                                                                               | 975   | 0.84 |
| P50554 | 4-aminobutyrate aminotransferase_ mitochondrial                                                          | 532   | 0.84 |
| P15791 | Calcium/calmodulin-dependent protein kinase type II subunit delta                                        | 215   | 0.84 |
| P47942 | Dihydropyrimidinase-related protein 2                                                                    | 10273 | 0.84 |
| Q9WVC0 | Septin-7                                                                                                 | 918   | 0.84 |
| Q5PQK1 | Septin-10                                                                                                | 478   | 0.83 |
| P60711 | Actin_ cytoplasmic 1                                                                                     | 18626 | 0.83 |
| P10860 | Glutamate dehydrogenase 1_ mitochondrial                                                                 | 998   | 0.83 |
| P11980 | Pyruvate kinase PKM                                                                                      | 5860  | 0.83 |
| P05065 | Fructose-bisphosphate aldolase A                                                                         | 4669  | 0.82 |
| P35704 | Peroxiredoxin-2                                                                                          | 2628  | 0.82 |
| P50399 | Rab GDP dissociation inhibitor beta                                                                      | 1455  | 0.82 |
| P09951 | Synapsin-1                                                                                               | 1081  | 0.82 |
| Q05982 | Nucleoside diphosphate kinase A                                                                          | 1313  | 0.81 |
| P47728 | Calretinin                                                                                               | 424   | 0.81 |
| P11442 | Clathrin heavy chain 1                                                                                   | 856   | 0.81 |

|        |                                                                          |       |      |
|--------|--------------------------------------------------------------------------|-------|------|
| P54311 | Guanine nucleotide-binding protein G(I)/G(S)/G(T) subunit beta-1         | 1174  | 0.81 |
| P16884 | Neurofilament heavy polypeptide                                          | 439   | 0.81 |
| P19804 | Nucleoside diphosphate kinase B                                          | 1400  | 0.81 |
| P62963 | Profilin-1                                                               | 997   | 0.81 |
| P16086 | Spectrin alpha chain_ non-erythrocytic 1                                 | 376   | 0.81 |
| P63259 | Actin_ cytoplasmic 2                                                     | 18626 | 0.80 |
| P13221 | Aspartate aminotransferase_ cytoplasmic                                  | 3479  | 0.80 |
| Q5RKI1 | Eukaryotic initiation factor 4A-II                                       | 246   | 0.80 |
| P04764 | Alpha-enolase                                                            | 4453  | 0.79 |
| P15429 | Beta-enolase                                                             | 1930  | 0.79 |
| P00507 | Aspartate aminotransferase_ mitochondrial                                | 3666  | 0.79 |
| Q5PPN4 | Carbonic anhydrase-related protein                                       | 387   | 0.79 |
| Q5XHZ0 | Heat shock protein 75 kDa_ mitochondrial                                 | 1011  | 0.79 |
| P50137 | Transketolase                                                            | 335   | 0.79 |
| P70478 | Adenomatous polyposis coli protein                                       | 32    | 0.78 |
| Q8VHF5 | Citrate synthase_ mitochondrial                                          | 442   | 0.78 |
| A7VJC2 | Heterogeneous nuclear ribonucleoproteins A2/B1                           | 645   | 0.78 |
| Q00715 | Histone H2B type 1                                                       | 8356  | 0.78 |
| Q66HF1 | NADH-ubiquinone oxidoreductase 75 kDa subunit_ mitochondrial             | 228   | 0.77 |
| P31044 | Phosphatidylethanolamine-binding protein 1                               | 11697 | 0.77 |
| P54313 | Guanine nucleotide-binding protein G(I)/G(S)/G(T) subunit beta-2         | 765   | 0.76 |
| P16290 | Phosphoglycerate mutase 2                                                | 310   | 0.76 |
| Q8VBU2 | Protein NDRG2                                                            | 1192  | 0.76 |
| P46462 | Transitional endoplasmic reticulum ATPase                                | 138   | 0.76 |
| Q9QUL6 | Vesicle-fusing ATPase                                                    | 544   | 0.76 |
| P67779 | Prohibitin                                                               | 67    | 0.76 |
| P02688 | Myelin basic protein                                                     | 13415 | 0.76 |
| P47819 | Glial fibrillary acidic protein                                          | 5630  | 0.75 |
| P09606 | Glutamine synthetase                                                     | 1725  | 0.75 |
| P42123 | L-lactate dehydrogenase B chain                                          | 4364  | 0.75 |
| P50398 | Rab GDP dissociation inhibitor alpha                                     | 2332  | 0.75 |
| Q920L2 | Succinate dehydrogenase [ubiquinone] flavoprotein subunit_ mitochondrial | 141   | 0.74 |
| P23565 | Alpha-internexin                                                         | 2488  | 0.74 |
| P84245 | Histone H3.3                                                             | 225   | 0.74 |

|        |                                                            |       |      |
|--------|------------------------------------------------------------|-------|------|
| P07340 | Sodium/potassium-transporting ATPase subunit beta-1        | 2934  | 0.74 |
| P37805 | Transgelin-3                                               | 1243  | 0.74 |
| O08839 | Myc box-dependent-interacting protein 1                    | 91    | 0.73 |
| P04906 | Glutathione S-transferase P                                | 413   | 0.73 |
| P82995 | Heat shock protein HSP 90-alpha                            | 1728  | 0.73 |
| P37377 | Alpha-synuclein                                            | 1351  | 0.73 |
| P07323 | Gamma-enolase                                              | 7429  | 0.73 |
| Q6LED0 | Histone H3.1                                               | 154   | 0.73 |
| P48500 | Triosephosphate isomerase                                  | 9329  | 0.73 |
| Q63754 | Beta-synuclein                                             | 3741  | 0.72 |
| P09811 | Glycogen phosphorylase_ liver form                         | 217   | 0.72 |
| O35264 | Platelet-activating factor acetylhydrolase IB subunit beta | 175   | 0.72 |
| Q63537 | Synapsin-2                                                 | 720   | 0.72 |
| P20788 | Cytochrome b-c1 complex subunit Rieske_ mitochondrial      | 765   | 0.71 |
| Q62950 | Dihydropyrimidinase-related protein 1                      | 1559  | 0.71 |
| P34058 | Heat shock protein HSP 90-beta                             | 1507  | 0.71 |
| P04797 | Glyceraldehyde-3-phosphate dehydrogenase                   | 17711 | 0.70 |
| P12839 | Neurofilament medium polypeptide                           | 760   | 0.70 |
| P07895 | Superoxide dismutase [Mn]_ mitochondrial                   | 515   | 0.70 |
| P31000 | Vimentin                                                   | 685   | 0.70 |
| Q8K586 | GTP-binding nuclear protein Ran_ testis-specific isoform   | 457   | 0.70 |
| P45592 | Cofilin-1                                                  | 4087  | 0.70 |
| P85834 | Elongation factor Tu_ mitochondrial                        | 158   | 0.70 |
| P13668 | Stathmin                                                   | 820   | 0.70 |
| P32551 | Cytochrome b-c1 complex subunit 2_ mitochondrial           | 188   | 0.69 |
| Q62952 | Dihydropyrimidinase-related protein 3                      | 313   | 0.69 |
| P21575 | Dynamin-1                                                  | 876   | 0.69 |
| Q08877 | Dynamin-3                                                  | 203   | 0.69 |
| P14408 | Fumarate hydratase_ mitochondrial                          | 254   | 0.69 |
| Q5U300 | Ubiquitin-like modifier-activating enzyme 1                | 208   | 0.69 |
| Q5M9I5 | Cytochrome b-c1 complex subunit 6_ mitochondrial           | 726   | 0.68 |
| P11240 | Cytochrome c oxidase subunit 5A_ mitochondrial             | 5469  | 0.68 |
| P97546 | Neuroplastin                                               | 121   | 0.68 |

|        |                                                                              |       |      |
|--------|------------------------------------------------------------------------------|-------|------|
| P16617 | Phosphoglycerate kinase 1                                                    | 2457  | 0.68 |
| P62828 | GTP-binding nuclear protein Ran                                              | 457   | 0.68 |
| B5DFN2 | S-adenosylhomocysteine hydrolase-like protein 1                              | 122   | 0.68 |
| Q05546 | Tenascin-R                                                                   | 74    | 0.68 |
| P84087 | Complexin-2                                                                  | 1164  | 0.67 |
| O35331 | Pyridoxal kinase                                                             | 225   | 0.67 |
| P39069 | Adenylate kinase isoenzyme 1                                                 | 1151  | 0.66 |
| P05708 | Hexokinase-1                                                                 | 192   | 0.66 |
| P31399 | ATP synthase subunit d_ mitochondrial                                        | 590   | 0.66 |
| F1LU71 | AU RNA binding protein/enoyl-coenzyme A hydratase (Predicted)_ isoform CRA_a | 133   | 0.66 |
| P09812 | Glycogen phosphorylase_ muscle form                                          | 142   | 0.66 |
| P10719 | ATP synthase subunit beta_ mitochondrial                                     | 11815 | 0.65 |
| P63018 | Heat shock cognate 71 kDa protein                                            | 6101  | 0.65 |
| P19527 | Neurofilament light polypeptide                                              | 2838  | 0.65 |
| P63041 | Complexin-1                                                                  | 1271  | 0.64 |
| P10818 | Cytochrome c oxidase subunit 6A1_ mitochondrial                              | 1010  | 0.64 |
| O35244 | Peroxiredoxin-6                                                              | 2447  | 0.64 |
| P48675 | Desmin                                                                       | 222   | 0.63 |
| P04905 | Glutathione S-transferase Mu 1                                               | 840   | 0.63 |
| P61980 | Heterogeneous nuclear ribonucleoprotein K                                    | 963   | 0.63 |
| O88767 | Protein DJ-1                                                                 | 3641  | 0.63 |
| Q6P6V0 | Glucose-6-phosphate isomerase                                                | 1843  | 0.61 |
| O35077 | Glycerol-3-phosphate dehydrogenase [NAD(+)]_ cytoplasmic                     | 124   | 0.61 |
| P48721 | Stress-70 protein_ mitochondrial                                             | 70    | 0.61 |
| P20761 | Ig gamma-2B chain C region                                                   | 197   | 0.60 |
| Q6IG00 | Keratin_ type II cytoskeletal 4                                              | 40    | 0.60 |
| Q10758 | Keratin_ type II cytoskeletal 8                                              | 46    | 0.60 |
| Q6P6Q2 | Keratin_ type II cytoskeletal 5                                              | 40    | 0.59 |
| Q4FZU2 | Keratin_ type II cytoskeletal 6A                                             | 41    | 0.59 |
| Q6IG12 | Keratin_ type II cytoskeletal 7                                              | 46    | 0.59 |
| Q4V7C7 | Actin-related protein 3                                                      | 106   | 0.58 |
| Q6IG05 | Keratin_ type II cytoskeletal 75                                             | 40    | 0.58 |

|        |                                                           |       |      |
|--------|-----------------------------------------------------------|-------|------|
| Q6P9V9 | Tubulin alpha-1B chain                                    | 19568 | 0.58 |
| Q9R063 | Peroxiredoxin-5_ mitochondrial                            | 1574  | 0.58 |
| Q5XIF6 | Tubulin alpha-4A chain                                    | 17102 | 0.58 |
| Q4QRB4 | Tubulin beta-3 chain                                      | 17303 | 0.58 |
| Q3KRE8 | Tubulin beta-2B chain                                     | 20340 | 0.57 |
| P02091 | Hemoglobin subunit beta-1                                 | 12645 | 0.57 |
| Q68FR8 | Tubulin alpha-3 chain                                     | 16700 | 0.57 |
| P85108 | Tubulin beta-2A chain                                     | 20368 | 0.57 |
| Q6P9T8 | Tubulin beta-4B chain                                     | 24062 | 0.57 |
| P69897 | Tubulin beta-5 chain                                      | 20595 | 0.57 |
| P27881 | Hexokinase-2                                              | 58    | 0.55 |
| P02262 | Histone H2A type 1                                        | 8926  | 0.55 |
| P0C169 | Histone H2A type 1-C                                      | 8926  | 0.54 |
| P0CC09 | Histone H2A type 2-A                                      | 8926  | 0.54 |
| Q4FZT6 | Histone H2A type 3                                        | 8926  | 0.54 |
| P27139 | Carbonic anhydrase 2                                      | 275   | 0.54 |
| P0C170 | Histone H2A type 1-E                                      | 8926  | 0.54 |
| Q64598 | Histone H2A type 1-F                                      | 8926  | 0.54 |
| Q00728 | Histone H2A type 4                                        | 8926  | 0.54 |
| A9UMV8 | Histone H2A.J                                             | 8926  | 0.54 |
| P11348 | Dihydropteridine reductase                                | 586   | 0.53 |
| Q6AY56 | Tubulin alpha-8 chain                                     | 13045 | 0.53 |
| P68370 | Tubulin alpha-1A chain                                    | 19965 | 0.53 |
| P02564 | Myosin-7                                                  | 19    | 0.52 |
| Q6AYZ1 | Tubulin alpha-1C chain                                    | 15961 | 0.51 |
| P84092 | AP-2 complex subunit mu                                   | 375   | 0.50 |
| Q9ESV6 | Glyceraldehyde-3-phosphate dehydrogenase_ testis-specific | 778   | 0.49 |
| P11517 | Hemoglobin subunit beta-2                                 | 3847  | 0.49 |
| P21818 | Stathmin-2                                                | 219   | 0.41 |
| Q6URK4 | Heterogeneous nuclear ribonucleoprotein A3                | 221   | 0.37 |
| Q66HA4 | Tax1-binding protein 1 homolog                            | 50    | 0.36 |
| Q5U4E6 | Golgin subfamily A member 4                               | 48    | 0.30 |



|        |                                                               |        |      |
|--------|---------------------------------------------------------------|--------|------|
| P56571 | ES1 protein homolog_ mitochondrial                            | 134    | 0.04 |
| P52760 | 2-iminobutanoate/2-iminopropanoate deaminase                  | 186.87 | -    |
| Q5XI79 | 2-oxoglutarate dehydrogenase_ mitochondrial                   | 239.61 | -    |
| O70352 | 3-hydroxyacyl-CoA dehydrogenase type-2                        | 200.64 | -    |
| P38983 | 40S ribosomal protein AS                                      | 214.63 | -    |
| P19945 | 60S acidic ribosomal protein P0                               | 45.45  | -    |
| P19944 | 60S acidic ribosomal protein P1                               | 1682.8 | -    |
| P49912 | Acidic leucine-rich nuclear phosphoprotein 32 family member A | 119.78 | -    |
| Q5M7U7 | Actin-related protein 2                                       | 134.84 | -    |
| Q99PD5 | Actin-related protein 2/3 complex subunit 1A                  | 455.11 | -    |
| P85971 | Actin-related protein 2/3 complex subunit 2                   | 163.49 | -    |
| P10760 | Adenosylhomocysteinase                                        | 33.29  | -    |
| Q9WUS0 | Adenylate kinase 4_ mitochondrial                             | 140.66 | -    |
| P52481 | Adenylyl cyclase-associated protein 2                         | 102.75 | -    |
| Q8CGZ2 | Afadin- and alpha-actinin-binding protein                     | 215.92 | -    |
| P50475 | Alanine--tRNA ligase_ cytoplasmic                             | 63.3   | -    |
| P14046 | Alpha-1-inhibitor 3                                           | 41.1   | -    |
| P48037 | Annexin A6                                                    | 113.2  | -    |
| P52303 | AP-1 complex subunit beta-1                                   | 80.86  | -    |
| P62944 | AP-2 complex subunit beta                                     | 162.63 | -    |
| P04639 | Apolipoprotein A-I                                            | 283.68 | -    |
| P02651 | Apolipoprotein A-IV                                           | 123.7  | -    |
| Q78E60 | Aryl hydrocarbon receptor nuclear translocator 2              | 52.16  | -    |
| Q5U318 | Astrocytic phosphoprotein PEA-15                              | 72.01  | -    |
| P35434 | ATP synthase subunit delta_ mitochondrial                     | 491.92 | -    |
| D3ZAF6 | ATP synthase subunit f_ mitochondrial                         | 137.3  | -    |
| P35435 | ATP synthase subunit gamma_ mitochondrial                     | 56.48  | -    |
| P16638 | ATP-citrate synthase                                          | 44.18  | -    |
| Q5U216 | ATP-dependent RNA helicase DDX39A                             | 61.39  | -    |
| Q05764 | Beta-adducin                                                  | 33.03  | -    |
| P70645 | Bleomycin hydrolase                                           | 126.44 | -    |
| P55068 | Brevican core protein                                         | 137.32 | -    |

|        |                                                                                                                  |        |   |
|--------|------------------------------------------------------------------------------------------------------------------|--------|---|
| Q568Z7 | Calcium and integrin-binding family member 2                                                                     | 99.59  | - |
| Q8K3P6 | Calcium-binding mitochondrial carrier protein SCaMC-2                                                            | 190.57 | - |
| D3Z8E6 | Calmodulin-regulated spectrin-associated protein 1                                                               | 50.83  | - |
| P09456 | cAMP-dependent protein kinase type I-alpha regulatory subunit                                                    | 73.13  | - |
| P47727 | Carbonyl reductase [NADPH] 1                                                                                     | 121.96 | - |
| Q9WU82 | Catenin beta-1                                                                                                   | 193.95 | - |
| P24268 | Cathepsin D                                                                                                      | 166.11 | - |
| P08081 | Clathrin light chain A                                                                                           | 152.01 | - |
| B1H228 | Coiled-coil domain-containing protein 114                                                                        | 34.58  | - |
| P01026 | Complement C3                                                                                                    | 28.25  | - |
| Q9Z2F5 | C-terminal-binding protein 1                                                                                     | 129.27 | - |
| Q9EQH5 | C-terminal-binding protein 2                                                                                     | 45.62  | - |
| O08651 | D-3-phosphoglycerate dehydrogenase                                                                               | 239.92 | - |
| O35078 | D-amino-acid oxidase                                                                                             | 120.9  | - |
| Q01205 | Dihydrolipoyllysine-residue succinyltransferase component of 2-oxoglutarate dehydrogenase complex_ mitochondrial | 105.38 | - |
| Q9JHU0 | Dihydropyrimidinase-related protein 5                                                                            | 81.23  | - |
| Q5U2P0 | DIS3-like exonuclease 1                                                                                          | 41.29  | - |
| Q62696 | Disks large homolog 1                                                                                            | 85.81  | - |
| Q63622 | Disks large homolog 2                                                                                            | 78.06  | - |
| P31016 | Disks large homolog 4                                                                                            | 86.82  | - |
| Q9WUL0 | DNA topoisomerase 1                                                                                              | 35.52  | - |
| Q6AYH5 | Dynactin subunit 2                                                                                               | 108.17 | - |
| O35303 | Dynamin-1-like protein                                                                                           | 77.85  | - |
| Q62671 | E3 ubiquitin-protein ligase UBR5                                                                                 | 48.7   | - |
| B5DF91 | ELAV-like protein 1                                                                                              | 51.23  | - |
| Q8CH84 | ELAV-like protein 2                                                                                              | 64.88  | - |
| O09032 | ELAV-like protein 4                                                                                              | 55.28  | - |
| Q9JI66 | Electrogenic sodium bicarbonate cotransporter 1                                                                  | 40.07  | - |
| P13803 | Electron transfer flavoprotein subunit alpha_ mitochondrial                                                      | 47.11  | - |
| Q68FU3 | Electron transfer flavoprotein subunit beta                                                                      | 139.57 | - |
| Q68FR6 | Elongation factor 1-gamma                                                                                        | 340.47 | - |
| P05197 | Elongation factor 2                                                                                              | 45.8   | - |

|        |                                                            |        |   |
|--------|------------------------------------------------------------|--------|---|
| Q5PPJ9 | Endophilin-B2                                              | 81.41  | - |
| A0JPN4 | Endoribonuclease ZC3H12A                                   | 84.28  | - |
| P23965 | Enoyl-CoA delta isomerase 1_ mitochondrial                 | 198.89 | - |
| Q4G061 | Eukaryotic translation initiation factor 3 subunit B       | 37.42  | - |
| P00884 | Fructose-bisphosphate aldolase B                           | 550.29 | - |
| P11762 | Galectin-1                                                 | 130    | - |
| P13264 | Glutaminase kidney isoform_ mitochondrial                  | 89.02  | - |
| P08010 | Glutathione S-transferase Mu 2                             | 44.87  | - |
| Q9Z1B2 | Glutathione S-transferase Mu 5                             | 45.56  | - |
| Q9Z339 | Glutathione S-transferase omega-1                          | 104.99 | - |
| P08009 | Glutathione S-transferase Yb-3                             | 220.41 | - |
| P82471 | Guanine nucleotide-binding protein G(q) subunit alpha      | 241.52 | - |
| Q9JID2 | Guanine nucleotide-binding protein subunit alpha-11        | 47.43  | - |
| P55205 | Guanylate cyclase 2G                                       | 43.34  | - |
| O88600 | Heat shock 70 kDa protein 4                                | 62.06  | - |
| Q66HA8 | Heat shock protein 105 kDa                                 | 45.92  | - |
| P04256 | Heterogeneous nuclear ribonucleoprotein A1                 | 127.11 | - |
| Q9JJ54 | Heterogeneous nuclear ribonucleoprotein D0                 | 117.88 | - |
| Q794E4 | Heterogeneous nuclear ribonucleoprotein F                  | 113.51 | - |
| Q8VHV7 | Heterogeneous nuclear ribonucleoprotein H                  | 220.04 | - |
| Q6AY09 | Heterogeneous nuclear ribonucleoprotein H2                 | 152.18 | - |
| F1LQ48 | Heterogeneous nuclear ribonucleoprotein L                  | 64.57  | - |
| Q6WRH9 | Immunoglobulin superfamily member 10                       | 32.74  | - |
| P52296 | Importin subunit beta-1                                    | 43.29  | - |
| Q63269 | Inositol 1_4_5-trisphosphate receptor type 3               | 40.38  | - |
| P97697 | Inositol monophosphatase 1                                 | 158.16 | - |
| Q68FX0 | Isocitrate dehydrogenase [NAD] subunit beta_ mitochondrial | 497.26 | - |
| Q6IG02 | Keratin_ type II cytoskeletal 2 epidermal                  | 40.35  | - |
| Q6IG03 | Keratin_ type II cytoskeletal 73                           | 40.35  | - |
| Q2PQA9 | Kinesin-1 heavy chain                                      | 51.58  | - |
| P70615 | Lamin-B1                                                   | 79.31  | - |
| Q6AXZ2 | Leucine-rich repeat-containing protein 46                  | 36.81  | - |

|        |                                                                      |        |   |
|--------|----------------------------------------------------------------------|--------|---|
| P19629 | L-lactate dehydrogenase C chain                                      | 63.5   | - |
| P43244 | Matrin-3                                                             | 53.06  | - |
| Q8VIG2 | Meiosis regulator and mRNA stability factor 1                        | 40.09  | - |
| Q63560 | Microtubule-associated protein 6                                     | 72.62  | - |
| Q5XIT1 | Microtubule-associated protein RP/EB family member 3                 | 45.41  | - |
| Q03626 | Murinoglobulin-1                                                     | 14.47  | - |
| Q6IE52 | Murinoglobulin-2                                                     | 11.18  | - |
| P07722 | Myelin-associated glycoprotein                                       | 55.31  | - |
| P02600 | Myosin light chain 1/3_ skeletal muscle isoform                      | 130.41 | - |
| P16409 | Myosin light chain 3                                                 | 112.89 | - |
| Q6MG60 | N(G)_N(G)-dimethylarginine dimethylaminohydrolase 2                  | 359.64 | - |
| P19234 | NADH dehydrogenase [ubiquinone] flavoprotein 2_ mitochondrial        | 716.41 | - |
| Q641Y2 | NADH dehydrogenase [ubiquinone] iron-sulfur protein 2_ mitochondrial | 76.19  | - |
| Q63374 | Neurexin-2                                                           | 70.26  | - |
| Q63376 | Neurexin-2-beta                                                      | 70.26  | - |
| P97686 | Neuronal cell adhesion molecule                                      | 313.12 | - |
| Q5FVM4 | Non-POU domain-containing octamer-binding protein                    | 231.95 | - |
| P13084 | Nucleophosmin                                                        | 140.65 | - |
| Q7TT47 | Paraplegin                                                           | 46.85  | - |
| P21807 | Peripherin                                                           | 52.87  | - |
| Q9WTR8 | PH domain leucine-rich repeat protein phosphatase 1                  | 46.15  | - |
| P97573 | Phosphatidylinositol 3_4_5-trisphosphate 5-phosphatase 1             | 44.07  | - |
| P16446 | Phosphatidylinositol transfer protein alpha isoform                  | 181.27 | - |
| P38652 | Phosphoglucomutase-1                                                 | 96.93  | - |
| Q4G033 | Piwi-like protein 4                                                  | 45.39  | - |
| Q05030 | Platelet-derived growth factor receptor beta                         | 52.22  | - |
| P56225 | POU domain_ class 5_ transcription factor 2                          | 71.17  | - |
| P48679 | Prelamin-A/C                                                         | 171.95 | - |
| Q9EPC6 | Profilin-2                                                           | 727.29 | - |
| P10960 | Prosaposin                                                           | 82.9   | - |
| P34064 | Proteasome subunit alpha type-5                                      | 83.39  | - |
| P11598 | Protein disulfide-isomerase A3                                       | 232.05 | - |

|        |                                                                   |        |   |
|--------|-------------------------------------------------------------------|--------|---|
| Q63081 | Protein disulfide-isomerase A6                                    | 77.17  | - |
| Q6AYT4 | Protein FAM122A                                                   | 110.45 | - |
| Q9Z0W5 | Protein kinase C and casein kinase substrate in neurons protein 1 | 158.19 | - |
| P68403 | Protein kinase C beta type                                        | 75.02  | - |
| Q9Z250 | Protein lin-7 homolog A                                           | 473.96 | - |
| Q792I0 | Protein lin-7 homolog C                                           | 447.2  | - |
| Q4V7D2 | Protein rogdi homolog                                             | 68.61  | - |
| Q5BJL5 | Protein strawberry notch homolog 1                                | 44.44  | - |
| Q5XIE1 | Protein THEM6                                                     | 58.73  | - |
| P22062 | Protein-L-isoaspartate(D-aspartate) O-methyltransferase           | 695.32 | - |
| P52873 | Pyruvate carboxylase_ mitochondrial                               | 76.02  | - |
| Q7TNY7 | Rab effector MyRIP                                                | 52.28  | - |
| Q5FWT8 | REST corepressor 2                                                | 125.26 | - |
| Q4FZU8 | Rho family-interacting cell polarization regulator 1              | 30.74  | - |
| Q09167 | Serine/arginine-rich splicing factor 5                            | 70.15  | - |
| G3V6S8 | Serine/arginine-rich splicing factor 6                            | 74.9   | - |
| P12346 | Serotransferrin                                                   | 59.23  | - |
| O35412 | Signal-induced proliferation-associated 1-like protein 1          | 36.94  | - |
| P61959 | Small ubiquitin-related modifier 2                                | 152.37 | - |
| Q5XIF4 | Small ubiquitin-related modifier 3                                | 152.37 | - |
| O35049 | Sphingomyelin phosphodiesterase 3                                 | 58.75  | - |
| Q63413 | Spliceosome RNA helicase Ddx39b                                   | 262.55 | - |
| Q02563 | Synaptic vesicle glycoprotein 2A                                  | 52.35  | - |
| Q62876 | Synaptogyrin-1                                                    | 143.6  | - |
| P28480 | T-complex protein 1 subunit alpha                                 | 63.99  | - |
| Q7TPB1 | T-complex protein 1 subunit delta                                 | 74.8   | - |
| Q68FQ0 | T-complex protein 1 subunit epsilon                               | 93.83  | - |
| Q9Z0V6 | Thioredoxin-dependent peroxide reductase_ mitochondrial           | 114.49 | - |
| Q920J4 | Thioredoxin-like protein 1                                        | 122.61 | - |
| Q9EQS0 | Transaldolase                                                     | 71.24  | - |
| P31232 | Transgelin                                                        | 266.59 | - |
| Q64428 | Trifunctional enzyme subunit alpha_ mitochondrial                 | 42.85  | - |

|        |                                                               |        |   |
|--------|---------------------------------------------------------------|--------|---|
| Q64560 | Tripeptidyl-peptidase 2                                       | 71.89  | - |
| P04692 | Tropomyosin alpha-1 chain                                     | 49.27  | - |
| P04177 | Tyrosine 3-monooxygenase                                      | 138.73 | - |
| B2RYG6 | Ubiquitin thioesterase OTUB1                                  | 121.2  | - |
| Q7M767 | Ubiquitin-conjugating enzyme E2 variant 2                     | 735.2  | - |
| Q4KM73 | UMP-CMP kinase                                                | 313.09 | - |
| Q9Z270 | Vesicle-associated membrane protein-associated protein A      | 210.28 | - |
| Q66H43 | BLOC-1-related complex subunit 6                              | 71.81  | + |
| Q63767 | Breast cancer anti-estrogen resistance protein 1              | 40.68  | + |
| Q68FR2 | Bridging integrator 2                                         | 41.83  | + |
| P29147 | D-beta-hydroxybutyrate dehydrogenase_ mitochondrial           | 61.65  | + |
| Q6P6T4 | Echinoderm microtubule-associated protein-like 2              | 40.53  | + |
| Q5XI72 | Eukaryotic translation initiation factor 4H                   | 137.81 | + |
| P30713 | Glutathione S-transferase theta-2                             | 273.54 | + |
| P29995 | Inositol 1_4_5-trisphosphate receptor type 2                  | 20.56  | + |
| P24062 | Insulin-like growth factor 1 receptor                         | 38.24  | + |
| Q566E5 | KDEL motif-containing protein 2                               | 57.23  | + |
| Q9JKW1 | Mitochondrial import inner membrane translocase subunit Tim22 | 189.26 | + |
| P97685 | Neurofascin                                                   | 29.95  | + |
| Q03351 | NT-3 growth factor receptor                                   | 62.02  | + |
| Q66H99 | Nucleolar protein 10                                          | 30.26  | + |
| Q65Z14 | Oncostatin-M-specific receptor subunit beta                   | 59.67  | + |
| Q62920 | PDZ and LIM domain protein 5                                  | 51.2   | + |
| P63245 | Receptor of activated protein C kinase 1                      | 63.29  | + |
| Q64612 | Receptor-type tyrosine-protein phosphatase V                  | 24.27  | + |
| P11507 | Sarcoplasmic/endoplasmic reticulum calcium ATPase 2           | 55.08  | + |
| P18596 | Sarcoplasmic/endoplasmic reticulum calcium ATPase 3           | 26.58  | + |
| Q63633 | Solute carrier family 12 member 5                             | 83.03  | + |
| P97690 | Structural maintenance of chromosomes protein 3               | 49.55  | + |
| Q6P6S0 | Synaptosomal-associated protein 47                            | 47.98  | + |
| Q62880 | Transcription initiation factor TFIID subunit 9B              | 117.34 | + |

<sup>a</sup>Accession ID according to Uniport.org database. Positive and negative values of fold change indicate up- and down-regulated proteins, respectively. Sign of – and + indicate exclusive expression in the control or exposed group, respectively. Results of the comparison between the IHg group *versus* the control group.

# The ARRIVE guidelines 2.0: author checklist

## The ARRIVE Essential 10

These items are the basic minimum to include in a manuscript. Without this information, readers and reviewers cannot assess the reliability of the findings.

| Item                                    | Recommendation                                                                                                                                                                                                                                                                                                                                                                                                                                                                                                                                                                                 | Section/line number, or reason for not reporting |
|-----------------------------------------|------------------------------------------------------------------------------------------------------------------------------------------------------------------------------------------------------------------------------------------------------------------------------------------------------------------------------------------------------------------------------------------------------------------------------------------------------------------------------------------------------------------------------------------------------------------------------------------------|--------------------------------------------------|
| <b>Study design</b>                     | 1 For each experiment, provide brief details of study design including: <ol style="list-style-type: none"> <li>The groups being compared, including control groups. If no control group has been used, the rationale should be stated.</li> <li>The experimental unit (e.g. a single animal, litter, or cage of animals).</li> </ol>                                                                                                                                                                                                                                                           | 14p and Fig.8                                    |
| <b>Sample size</b>                      | 2 <ol style="list-style-type: none"> <li>Specify the exact number of experimental units allocated to each group, and the total number in each experiment. Also indicate the total number of animals used.</li> <li>Explain how the sample size was decided. Provide details of any <i>a priori</i> sample size calculation, if done.</li> </ol>                                                                                                                                                                                                                                                | 10p and figure captions                          |
| <b>Inclusion and exclusion criteria</b> | 3 <ol style="list-style-type: none"> <li>Describe any criteria used for including and excluding animals (or experimental units) during the experiment, and data points during the analysis. Specify if these criteria were established <i>a priori</i>. If no criteria were set, state this explicitly.</li> <li>For each experimental group, report any animals, experimental units or data points not included in the analysis and explain why. If there were no exclusions, state so.</li> <li>For each analysis, report the exact value of <i>n</i> in each experimental group.</li> </ol> | 10p.<br><br>10p.<br>10p and figure captions      |
| <b>Randomisation</b>                    | 4 <ol style="list-style-type: none"> <li>State whether randomisation was used to allocate experimental units to control and treatment groups. If done, provide the method used to generate the randomisation sequence.</li> <li>Describe the strategy used to minimise potential confounders such as the order of treatments and measurements, or animal/cage location. If confounders were not controlled, state this explicitly.</li> </ol>                                                                                                                                                  | 10p.<br><br>10-11p.                              |
| <b>Blinding</b>                         | 5 Describe who was aware of the group allocation at the different stages of the experiment (during the allocation, the conduct of the experiment, the outcome assessment, and the data analysis).                                                                                                                                                                                                                                                                                                                                                                                              | 11p.                                             |
| <b>Outcome measures</b>                 | 6 <ol style="list-style-type: none"> <li>Clearly define all outcome measures assessed (e.g. cell death, molecular markers, or behavioural changes).</li> <li>For hypothesis-testing studies, specify the primary outcome measure, i.e. the outcome measure that was used to determine the sample size.</li> </ol>                                                                                                                                                                                                                                                                              | 10-13p.<br><br>10-13p.                           |
| <b>Statistical methods</b>              | 7 <ol style="list-style-type: none"> <li>Provide details of the statistical methods used for each analysis, including software used.</li> <li>Describe any methods used to assess whether the data met the assumptions of the statistical approach, and what was done if the assumptions were not met.</li> </ol>                                                                                                                                                                                                                                                                              | 13p.<br><br>13p.                                 |
| <b>Experimental animals</b>             | 8 <ol style="list-style-type: none"> <li>Provide species-appropriate details of the animals used, including species, strain and substrain, sex, age or developmental stage, and, if relevant, weight.</li> <li>Provide further relevant information on the provenance of animals, health/immune status, genetic modification status, genotype, and any previous procedures.</li> </ol>                                                                                                                                                                                                         | 10p.<br><br>10p.                                 |
| <b>Experimental procedures</b>          | 9 For each experimental group, including controls, describe the procedures in enough detail to allow others to replicate them, including: <ol style="list-style-type: none"> <li>What was done, how it was done and what was used.</li> <li>When and how often.</li> <li>Where (including detail of any acclimatisation periods).</li> <li>Why (provide rationale for procedures).</li> </ol>                                                                                                                                                                                                  | 10-13p.                                          |
| <b>Results</b>                          | 10 For each experiment conducted, including independent replications, report: <ol style="list-style-type: none"> <li>Summary/descriptive statistics for each experimental group, with a measure of variability where applicable (e.g. mean and SD, or median and range).</li> <li>If applicable, the effect size with a confidence interval.</li> </ol>                                                                                                                                                                                                                                        | 3-7p.                                            |

# The Recommended Set

These items complement the Essential 10 and add important context to the study. Reporting the items in both sets represents best practice.

|                                                |    |                                                                                                                                                                                                                                                                                                                                                                                                                                | Section/line Recommendation number, or reason for not reporting |
|------------------------------------------------|----|--------------------------------------------------------------------------------------------------------------------------------------------------------------------------------------------------------------------------------------------------------------------------------------------------------------------------------------------------------------------------------------------------------------------------------|-----------------------------------------------------------------|
| <b>Abstract</b>                                | 11 | Provide an accurate summary of the research objectives, animal species, strain and sex, key methods, principal findings, and study conclusions.                                                                                                                                                                                                                                                                                | 1p.                                                             |
| <b>Background</b>                              | 12 | <ul style="list-style-type: none"> <li>a. Include sufficient scientific background to understand the rationale and context for the study, and explain the experimental approach.</li> <li>b. Explain how the animal species and model used address the scientific objectives and, where appropriate, the relevance to human biology.</li> </ul>                                                                                | 1-2p.                                                           |
| <b>Objectives</b>                              | 13 | Clearly describe the research question, research objectives and, where appropriate, specific hypotheses being tested.                                                                                                                                                                                                                                                                                                          | 1-2p.                                                           |
| <b>Ethical statement</b>                       | 14 | Provide the name of the ethical review committee or equivalent that has approved the use of animals in this study, and any relevant licence or protocol numbers (if applicable). If ethical approval was not sought or granted, provide a justification.                                                                                                                                                                       | 10p.                                                            |
| <b>Housing and husbandry</b>                   | 15 | Provide details of housing and husbandry conditions, including any environmental enrichment.                                                                                                                                                                                                                                                                                                                                   | 10p.                                                            |
| <b>Animal care and monitoring</b>              | 16 | <ul style="list-style-type: none"> <li>a. Describe any interventions or steps taken in the experimental protocols to reduce pain, suffering and distress.</li> <li>b. Report any expected or unexpected adverse events.</li> <li>c. Describe the humane endpoints established for the study, the signs that were monitored and the frequency of monitoring. If the study did not have humane endpoints, state this.</li> </ul> | 10-11p.                                                         |
| <b>Interpretation/ scientific implications</b> | 17 | <ul style="list-style-type: none"> <li>a. Interpret the results, taking into account the study objectives and hypotheses, current theory and other relevant studies in the literature.</li> <li>b. Comment on the study limitations including potential sources of bias, limitations of the animal model, and imprecision associated with the results.</li> </ul>                                                              | 3-7p.                                                           |
| <b>Generalisability/ translation</b>           | 18 | Comment on whether, and how, the findings of this study are likely to generalise to other species or experimental conditions, including any relevance to human biology (where appropriate).                                                                                                                                                                                                                                    | 8-10p.                                                          |
| <b>Protocol registration</b>                   | 19 | Provide a statement indicating whether a protocol (including the research question, key design features, and analysis plan) was prepared before the study, and if and where this protocol was registered.                                                                                                                                                                                                                      | 10p.                                                            |
| <b>Data access</b>                             | 20 | Provide a statement describing if and where study data are available.                                                                                                                                                                                                                                                                                                                                                          | 14p.                                                            |
| <b>Declaration of interests</b>                | 21 | <ul style="list-style-type: none"> <li>a. Declare any potential conflicts of interest, including financial and non-financial. If none exist, this should be stated.</li> <li>b. List all funding sources (including grant identifier) and the role of the funder(s) in the design, analysis and reporting of the study.</li> </ul>                                                                                             | 14-15p.                                                         |
